# Supplementary material for: Urolithin A Promotes Angiogenesis and Tissue Regeneration in a Full-Thickness Cutaneous Wound Model
Source: Frontiers journal article supplement (doi:10.3389/fphar.2022.806284), 2022-03-14
Supplement: Image_1.pdf [file Image_1.pdf]

## Supplemental Information

### Urolithin A promotes angiogenesis and tissue regeneration in a full-thickness cutaneous wound model

#### Running title: Urolithin A in wound healing

Zhen-hua Feng<sup>1,2 \*</sup>, Jia Chen<sup>1,2\*</sup>, Pu-tao Yuan<sup>1,2 \*</sup>, Zhong-yin Ji<sup>1,2</sup>, Si-yue Tao<sup>1,2</sup>, Lin Zheng<sup>1,2</sup>, Xiao-an Wei<sup>1,2</sup>, Ze-yu Zheng<sup>1,2</sup>, Bing-jie Zheng<sup>1,2</sup>, Bin Chen<sup>3#</sup>, Jian Chen<sup>1,2#</sup>, Feng-dong Zhao<sup>1,2#</sup>

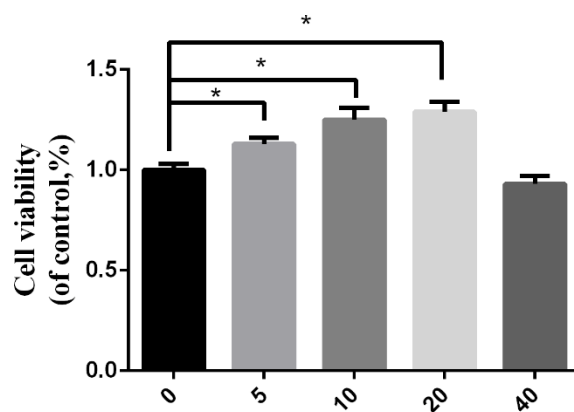

**Supplementary Fig.1** Cell viability test results of HUVECs treated with different concentrations of UA in serum-free medium.
